# Supplementary material for: Constructing Ni species-incorporated CoP@N-doped carbon nanosheet arrays for efficient self-powered hydrazine-assisted seawater electrolysis
Source: Royal Society of Chemistry journal article supplement (doi:10.1039/d4qi01740d), 2024-01-01
Supplement: d4qi01740d1.pdf [file d4qi01740d1.pdf]

# Supporting information

**Constructing Ni Species-Incorporated CoP@N-Doped Carbon  
Nanosheet Arrays for Efficient Self-Powered Hydrazine-Assisted  
Seawater Electrolysis**

Feng-Xiao Yan, Hao-Yu Wang, Lei Wang, Hao Wang, Zhong-Yong Yuan\*  
School of Materials Science and Engineering, Smart Sensing Interdisciplinary  
Science Center, Nankai University, Tianjin 300350, China

\* Corresponding author. *E-mail address:* zyyuan@nankai.edu.cn

## 1. Experimental section

### 1.1 Materials

Ammonium chloride ( $\text{NH}_4\text{Cl}$ , 99.5%), potassium hydroxide (KOH, 85%) were received from Tianjin Bohua Chemical Reagent Co., Ltd. 2-methylimidazole was obtained from Shanghai Merrier Biochemical Technology Co., Ltd. Cobaltous nitrate ( $\text{Co}(\text{NO}_3)_2 \cdot 6\text{H}_2\text{O}$ , 99.9%) was obtained from Shanghai Titan Technology Co., Ltd, Nickel nitrate ( $\text{Ni}(\text{NO}_3)_2 \cdot 6\text{H}_2\text{O}$ , 98.0%) was obtained from Tianjin Damao Chemical Reagent Factory. Chloride hexahydrate ( $\text{CoCl}_2 \cdot 6\text{H}_2\text{O}$ , 99.0%) was purchased from Tianjin Fengchuan Chemical Reagent Technology Co., Ltd. Sodium hypophosphite ( $\text{NaH}_2\text{PO}_2 \cdot \text{H}_2\text{O}$ , 99.0%) and acetone (99.5%) were ordered from Tianjin Chemical Reagent Supply and Marketing Co., Ltd. Nickel foam (99%) used in the study was obtained from Shanxi Lizhiyuan Technology Co., Ltd. Ethanol (99.7%) was received from Concord Technology Co., Ltd. Hydrochloric acid (HCl, 36.0% ~ 38.0%) was purchased from Yongfei Chemical Reagent Co., Ltd. Deionized water was obtained from Tianjin Huaxun Medical Technology Co., Ltd. Moreover, 20 wt% Pt/C was received from Shanghai Hesun Electric Co., Ltd. Hydrazine hydrate ( $\text{N}_2\text{H}_4 \cdot \text{H}_2\text{O}$ , 80%) was purchased from Tianjin Damao Chemical Reagent Co., Ltd.

### 1.2 Electrochemical measurements

Electrochemical characterization was conducted using a CHI 760E electrochemical station in alkaline electrolyte at room temperature. A typical three-electrode setup was employed, comprising the prepared sample as the working electrode, a platinum wire as the counter electrode and a Hg/HgO electrode reference. This setup facilitated the assessment of electrocatalytic performance for HER, OER and HzOR. Moreover, seawater splitting electrolysis and hydrazine-assisted seawater splitting were carried out in a two-electrode configuration, utilizing Ni-CoP@NC material as both the anode and cathode. The experiments were conducted in different electrolytes: 1.0 M KOH and 1.0 M KOH with 0.2 M hydrazine, respectively. Besides, Electrocatalytic methanol oxidation, ethanol oxidation, glucose oxidation, and urea oxidation were conducted in different electrolytes: 0.1 M methanol solution, ethanol solution, glucose solution and

urea solution, respectively.

In this study, all potentials were referenced to the reversible hydrogen electrode (RHE) using the formula:  $E_{vs\ RHE} = E_{vs\ Hg/HgO} + 0.059\ pH + E_{vs\ Hg/HgO}$ . The working electrodes had a geometric surface area of approximately  $0.5\ cm^2$ . Linear sweep voltammetry (LSV) was conducted at a scan rate of  $5\ mV\ s^{-1}$ , with the Tafel slope was determined using the Tafel equation ( $\eta = a + b\log j$ ). The double layer capacitance ( $C_{dl}$ ) was calculated from cyclic voltammetry (CV) data obtained at scan rates ranging from 10 to  $30\ mV\ s^{-1}$  using the equation  $C_{dl} = (j_a - j_c)/(2*v)$ .

Electrochemical impedance spectroscopy (EIS) was conducted across a frequency range of 0.01 to 100000 Hz with an amplitude of 5 mV. Stability tests for HER and HzOR were performed over 24 hours in both 1 M KOH and 1 M KOH with 0.5 M  $N_2H_4$ . Similarly, the stability of hydrazine-assisted seawater splitting was assessed in natural seawater with 0.5 M  $N_2H_4$  at a constant current density of  $200\ mA\ cm^{-2}$  over 48 hours.

The fuel cell was assembled using Ni-CoP@NC as anode and Ni foam-supported commercial Pt/C catalyst as cathode. The anode was immersed in 1 M KOH with 0.2 M  $N_2H_4$ , while cathodic electrolyte was 1 M KOH. The Zn-Hz battery was assembled using Ni-CoP@NC as cathode and Zn foil as anode, separated by anion exchange membrane (AEM) as separator. The cathode was immersed in 1 M KOH with 0.2 M  $N_2H_4$ , while anodic electrolyte was 1 m KOH with 0.02 M  $Zn(CH_3COO)_2$ .

### **1.3 Techno-economic analysis**

Energy consumption (EC) ( $kWh\ Kg^{-1}\ H_2$ ) was calculated according to the following equation: Energy consumption (EC) ( $kWh\ Kg^{-1}\ H_2$ ) is calculated according to the following equation:

$$EC = UIt/1000$$

$$Q = nZF = It$$

where,  $U$  is the cell voltage, and the cell voltage is calculated on the assumption that the required anodic potential is 1.23 V vs. RHE without overpotentials;  $I$  is the current;  $t$  represents the time to remove 1 kg  $H_2$ ;  $Q$  is the actual consumed charge amount;  $F$  is the

faradaic constant (96485 C mol<sup>-1</sup>);  $z$  is the number of transferred electrons ( $n = 2$ ); and  $n$  is the amount of H<sub>2</sub> in mol (1 kg H<sub>2</sub> = 500 mol). And then, the cost for producing per kg H<sub>2</sub> was calculated he electricity cost of \$0.104 per kWh in China.

#### 1.4 Density functional theory

To investigate the electroactivity, DFT calculations have been applied to reveal the electronic modulations induced by Ni species-incorporated Co<sub>2</sub>P nanosheet arrays encapsulated in N-doped carbon layers grown on Ni foam. To accurately describe the exchange-correlation interactions, we have selected the generalized gradient approximation (GGA) and Perdew-Burke-Ernzerhof (PBE) functionals. Meanwhile, the plane-wave basis cutoff energy has been set to 450 eV based on the ultrafine quality and the ultrasoft pseudopotentials. The Broyden-Fletcher-Goldfarb-Shannon (BFGS) algorithm is selected for all the geometry optimizations. The coarse quality of k points has been applied for all the energy minimizations. We have selected the (121) surfaces of Co<sub>2</sub>P as a representative surface to investigate the electronic modulation induced by Ni incorporating, which is consistent with the experimental characterizations. To guarantee sufficient relaxation, we have introduced 15 Å vacuum space on the z-axis. To achieve convincing convergence, the following criteria are applied for all the geometry optimizations including the Hellmann-Feynman forces should not exceed 0.001 eV/Å; the total energy difference should not be over 5×10<sup>-5</sup> eV/atom, and the inter-ionic displacement should be less than 0.005 Å.

The oxidation of hydrazine into nitrogen and hydrogen occurs in the following six consecutive elementary steps:

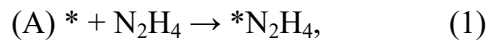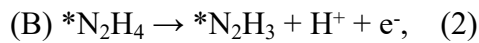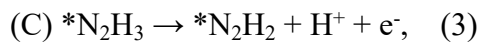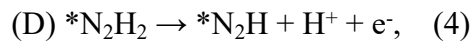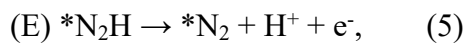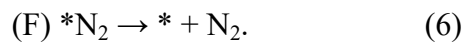

The asterisk (\*) represents the reaction surfaces. “\*N<sub>2</sub>H<sub>4</sub>”, “\*N<sub>2</sub>H<sub>3</sub>”, “\*N<sub>2</sub>H<sub>2</sub>”, “\*N<sub>2</sub>H”,

and “\*N<sub>2</sub>” denote the models with the corresponding chemisorbed species residing in the reaction surfaces. Among these six elementary steps, steps (A) and (F) are the adsorption of N<sub>2</sub>H<sub>4</sub> and desorption of N<sub>2</sub>, respectively. The other four elementary steps involve the generation of one proton and one electron. Then, using the computational hydrogen electrode (pH = 0, P = 1 atm, T = 298 K), the Gibbs free energy of H<sup>+</sup> + e<sup>-</sup> was replaced implicitly with the Gibbs free energy of one-half an H<sub>2</sub> molecule. Thus the reaction Gibbs free energies can be calculated with Eqs:

$$\Delta G_A = \Delta G_{*N_2H_4} - \Delta G_* - \Delta G_{N_2H_4} \quad (7)$$

$$\Delta G_B = \Delta G_{*N_2H_3} + 0.5\Delta G_{H_2} - \Delta G_{*N_2H_4} - eU - kT \ln 10^{*pH} \quad (8)$$

$$\Delta G_C = \Delta G_{*N_2H_2} + 0.5\Delta G_{H_2} - \Delta G_{*N_2H_3} - eU - kT \ln 10^{*pH} \quad (9)$$

$$\Delta G_D = \Delta G_{*N_2H} + 0.5\Delta G_{H_2} - \Delta G_{*N_2H_2} - eU - kT \ln 10^{*pH} \quad (10)$$

$$\Delta G_E = \Delta G_{*N_2} + 0.5\Delta G_{H_2} - \Delta G_{*N_2H} - eU - kT \ln 10^{*pH} \quad (11)$$

$$\Delta G_F = \Delta G_* + G_{N_2} - \Delta G_{*N_2} \quad (12)$$

U and the pH value in this work is set to zero. The adsorption or reaction Gibbs free energy is defined as  $\Delta G = \Delta E + (ZPE - T\Delta S)$ , where  $\Delta E$  is the adsorption or reaction energy based on DFT calculations,  $\Delta ZPE$  is the zero-point energy (ZPE) correction, T is the temperature, and  $\Delta S$  is the entropy change. For each system, its ZPE can be calculated by summing vibrational frequencies overall normal modes  $\nu$  ( $ZPE = 1/2 \sum \hbar\nu$ ). The entropies of gas-phase H<sub>2</sub>, N<sub>2</sub>, and NH<sub>2</sub>NH<sub>2</sub> are obtained from the NIST database<sup>3</sup> with the standard condition, and the adsorbed species were only taken vibrational entropy ( $S_v$ ) into account, as shown in the following formula:

$$S_v = \sum_i R \left\{ \frac{h\nu_i}{k_B T} \exp\left(\frac{h\nu_i}{k_B T}\right) - k_B T \right\} - \ln[1 - \exp(-h\nu_i/k_B T)] \quad (13)$$

Among which  $R = 8.314 \text{ J} \cdot \text{mol}^{-1} \cdot \text{K}^{-1}$ ,  $T = 298.15 \text{ K}$ ,  $h = 6.63 \times 10^{-34} \text{ J} \cdot \text{s}$ ,  $k_B = 1.38 \times 10^{-23} \text{ J} \cdot \text{K}^{-1}$ ,  $i$  is the frequency number,  $\nu_i$  is the vibrational frequency (unit is  $\text{cm}^{-1}$ ).

Under the standard condition, the overall HER pathway includes two steps: first, adsorption of hydrogen on the catalytic site (\*) from the initial state (H<sup>+</sup> + e<sup>-</sup> + \*), second, release the product hydrogen (1/2 H<sub>2</sub>). The total energies of H<sup>+</sup> + e<sup>-</sup> and 1/2 H<sub>2</sub>

are equal. Therefore, the Gibbs free energy of the adsorption of the intermediate hydrogen on a catalyst ( $\Delta G_H$ ) is the key descriptor of the HER activity of the catalyst and is obtained by:

$$\Delta G_H = \Delta E_H + \Delta ZPE - T\Delta S$$

where  $\Delta E_H$ ,  $\Delta ZPE$  and  $\Delta S$  are the adsorption energy, zero-point energy change and entropy change of H adsorption, respectively.

## 2. Supplementary figures

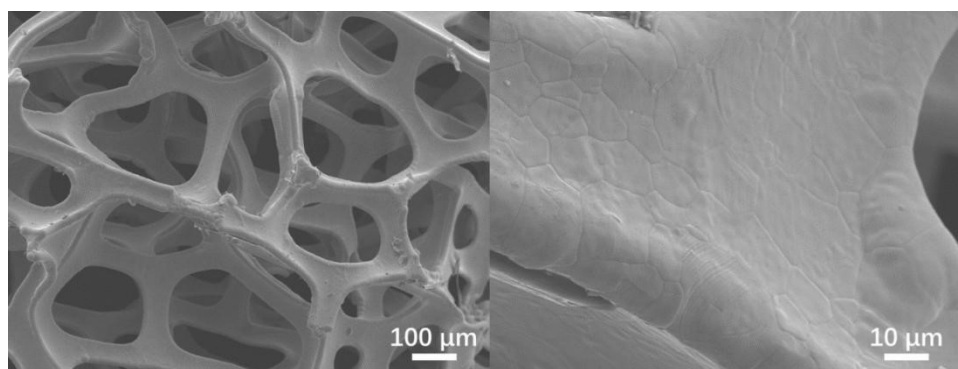

**Fig. S1.** SEM images of original Ni foam (NF).

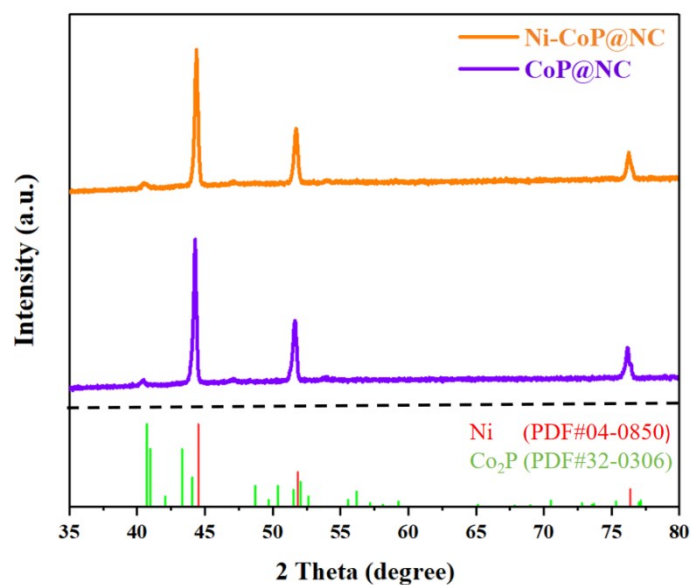

**Fig. S2.** Magnified XRD patterns of Ni-CoP@NC and CoP@NC.

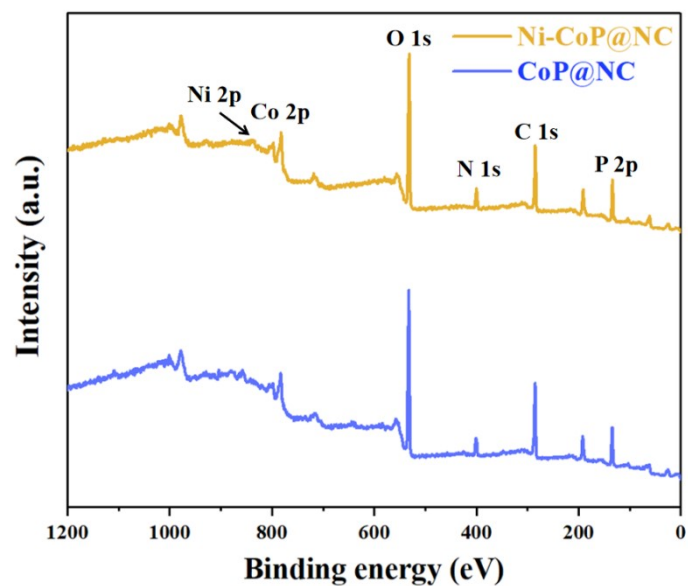

**Fig. S3.** XPS survey spectra for Ni-CoP@NC and CoP@NC.

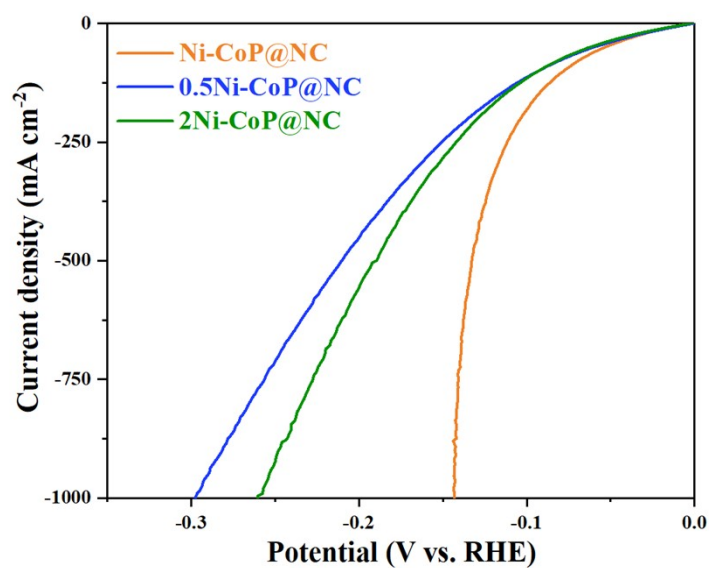

**Fig. S4.** LSV curves of samples with different Ni species incorporating.

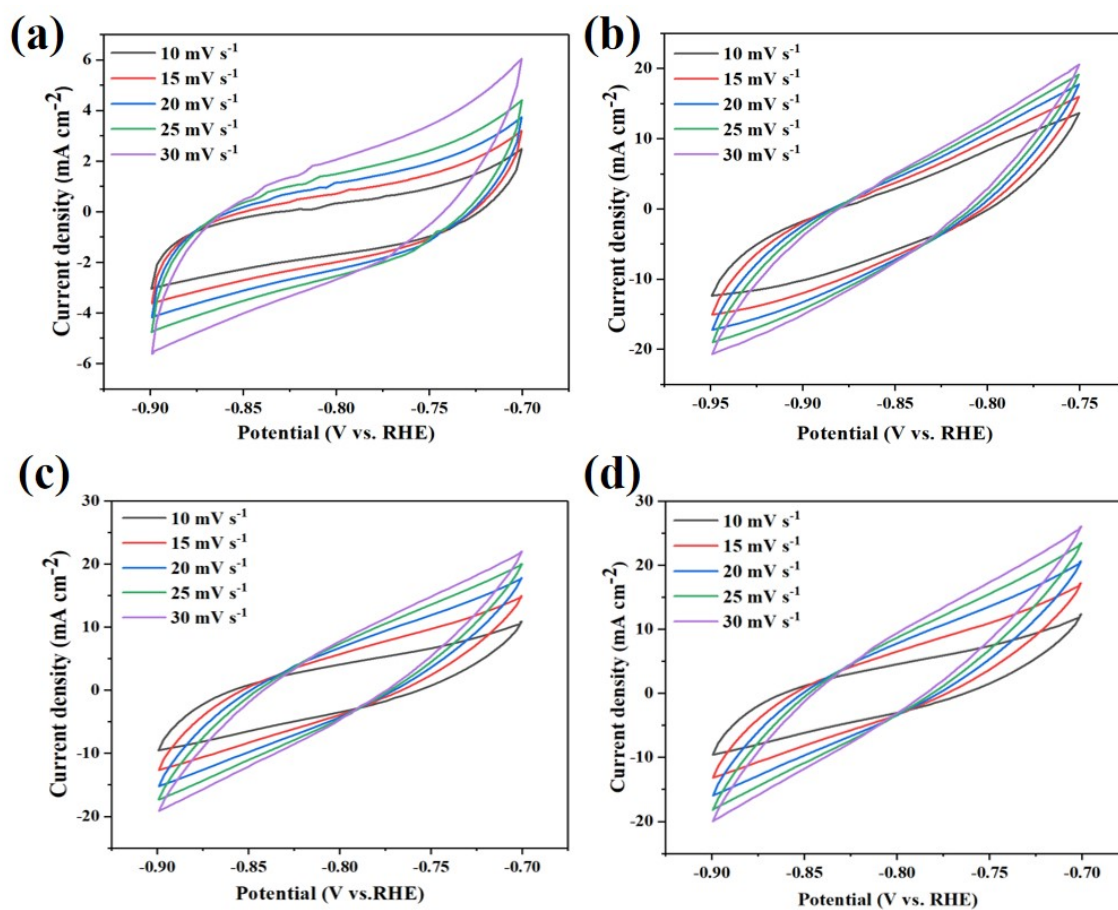

**Fig. S5.** CVs with different scan rates from  $30 \text{ mV s}^{-1}$  to  $10 \text{ mV s}^{-1}$  of (a) Ni-CoP@NC, (b) CoP@NC, (c) 0.5Ni-CoP@NC and (d) 2Ni-CoP@NC.

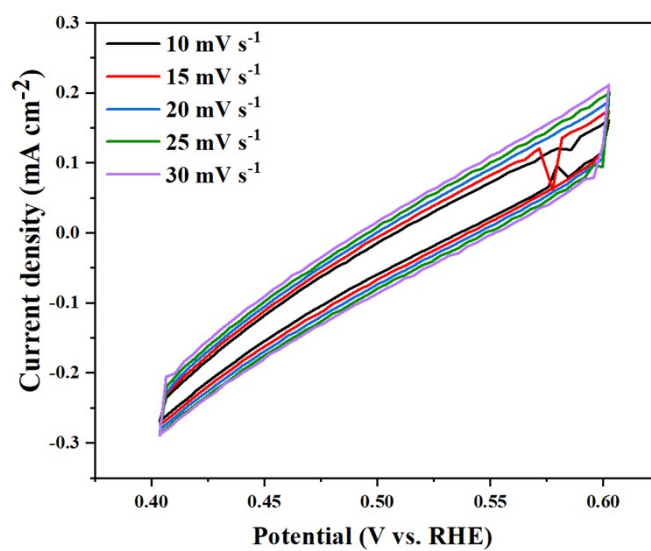

**Fig. S6.** CVs with different scan rates from  $30 \text{ mV s}^{-1}$  to  $10 \text{ mV s}^{-1}$  of NF.



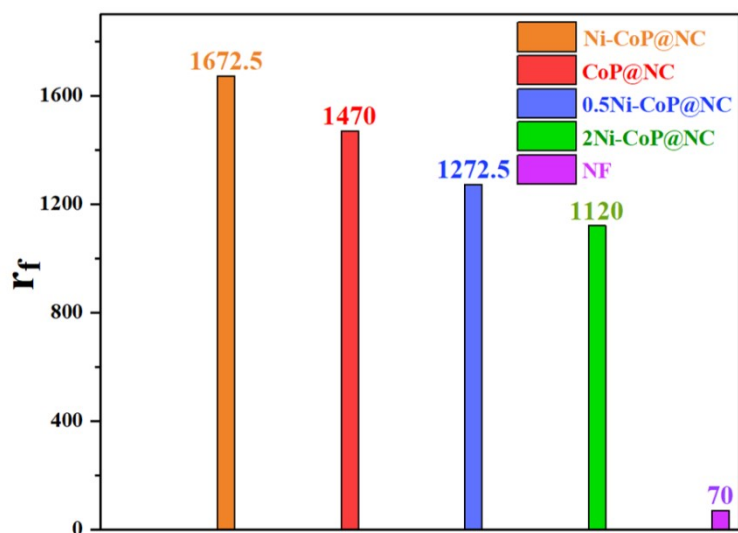

**Fig. S7.** Roughness factor of Ni-CoP@NC, CoP@NC, 0.5Ni-CoP@NC, 2Ni-CoP@NC and NF.

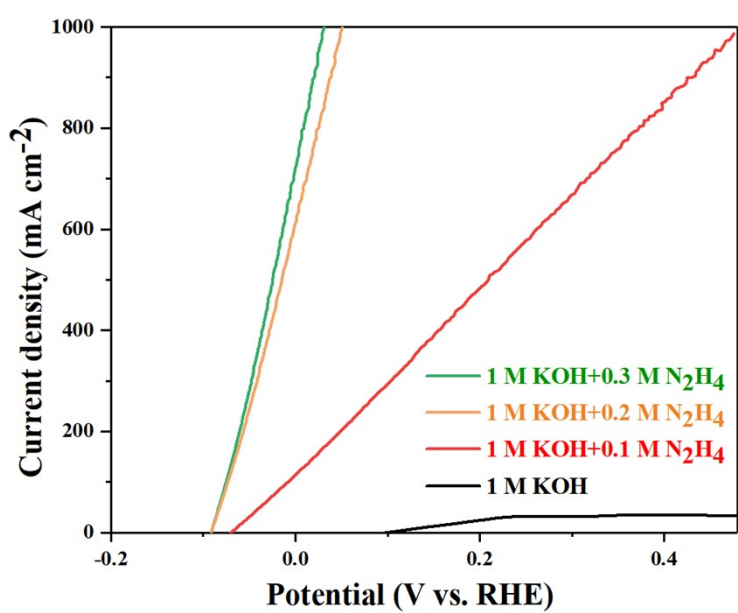

**Fig. S8.** LSV curves of Ni-CoP@NC in 1.0 M KOH with various hydrazine concentrations.

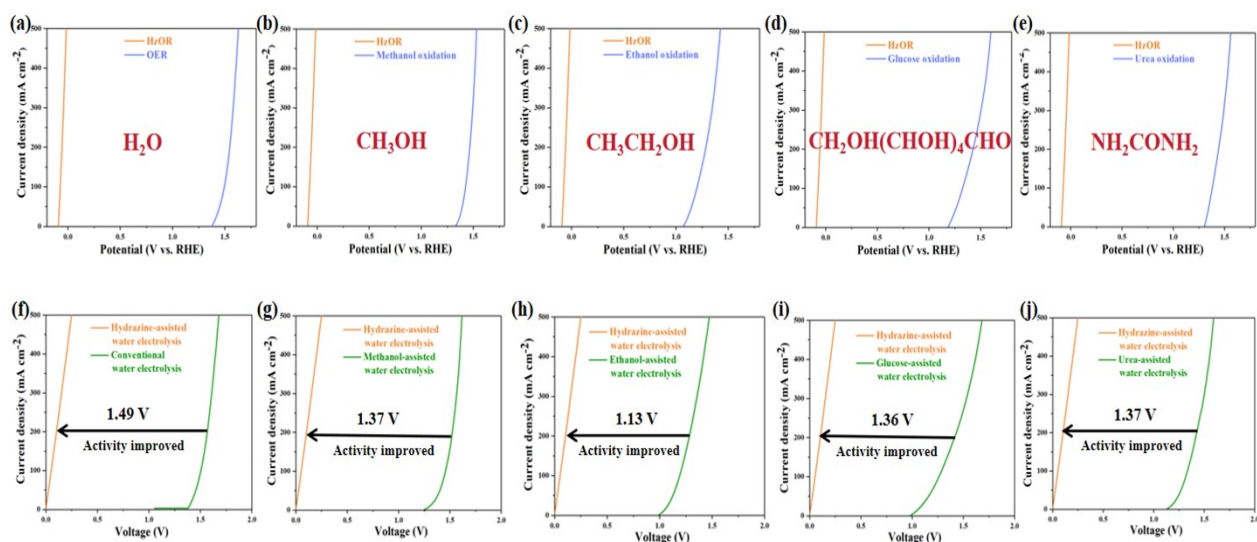

**Fig. S9.** The electrocatalytic process of Ni-CoP@NC across various reactions including (a) electrocatalytic oxygen evolution, (b) methanol oxidation, (c) ethanol oxidation, (d) glucose oxidation, and (e) urea oxidation. Employing Ni-CoP@NC in (f) conventional water electrolysis system, (g) methanol-assisted water electrolysis system, (h) ethanol-assisted water electrolysis system, (i) glucose-assisted water electrolysis system, and (j) urea-assisted water electrolysis system.

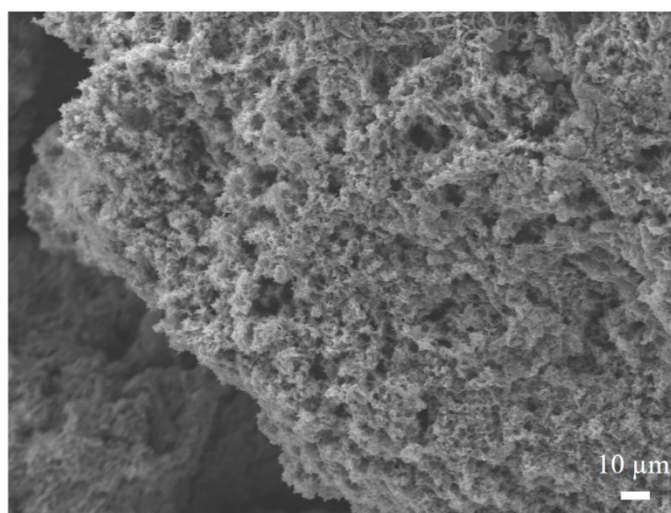

**Fig. S10.** SEM image of the post-HER Ni-CoP@NC.

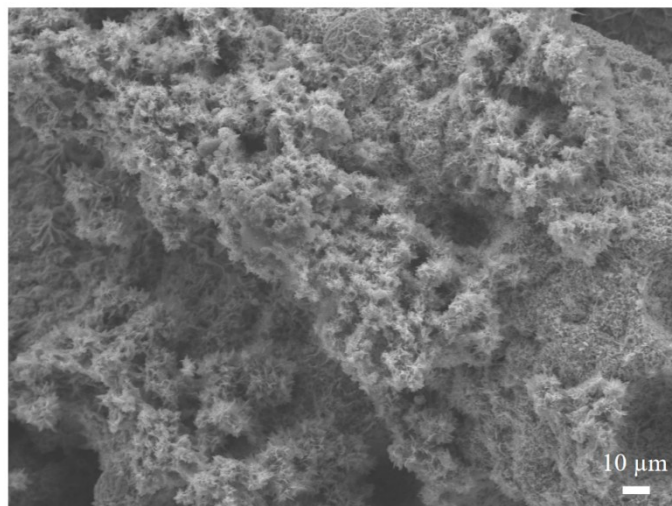

**Fig. S11.** SEM image of the post-HzOR Ni-CoP@NC.

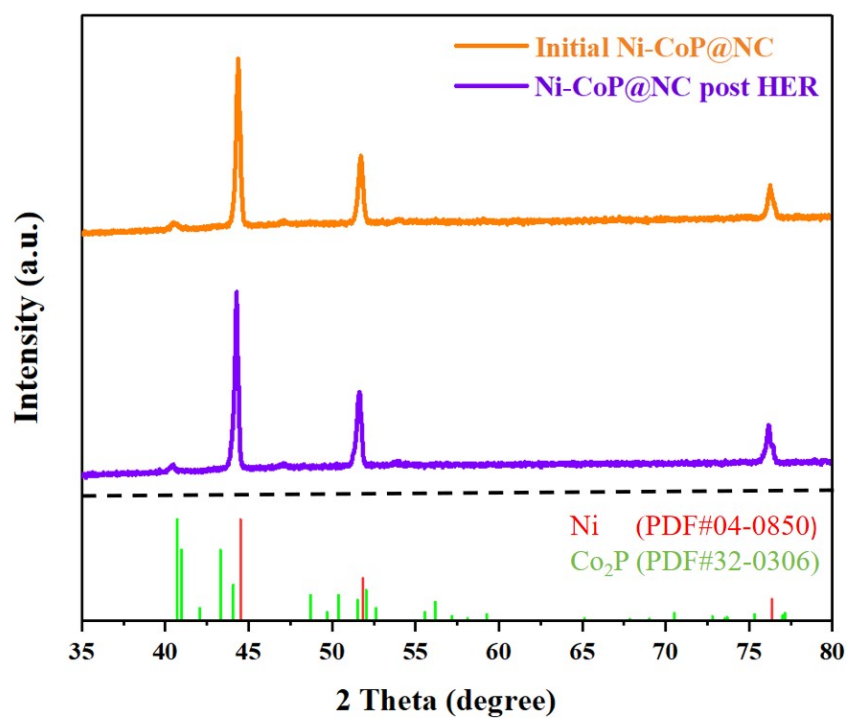

**Fig. S12.** XRD characterization of initial Ni-CoP@NC and Ni-CoP@NC after long-term HER ability measurements.

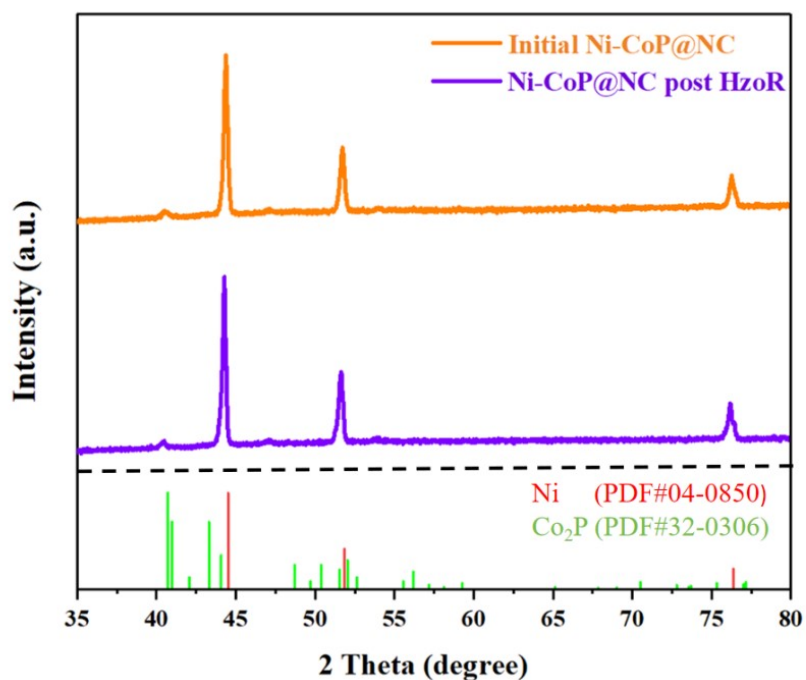

**Fig. S13.** XRD characterization of initial Ni-CoP@NC and Ni-CoP@NC after long-term HzOR ability measurements.

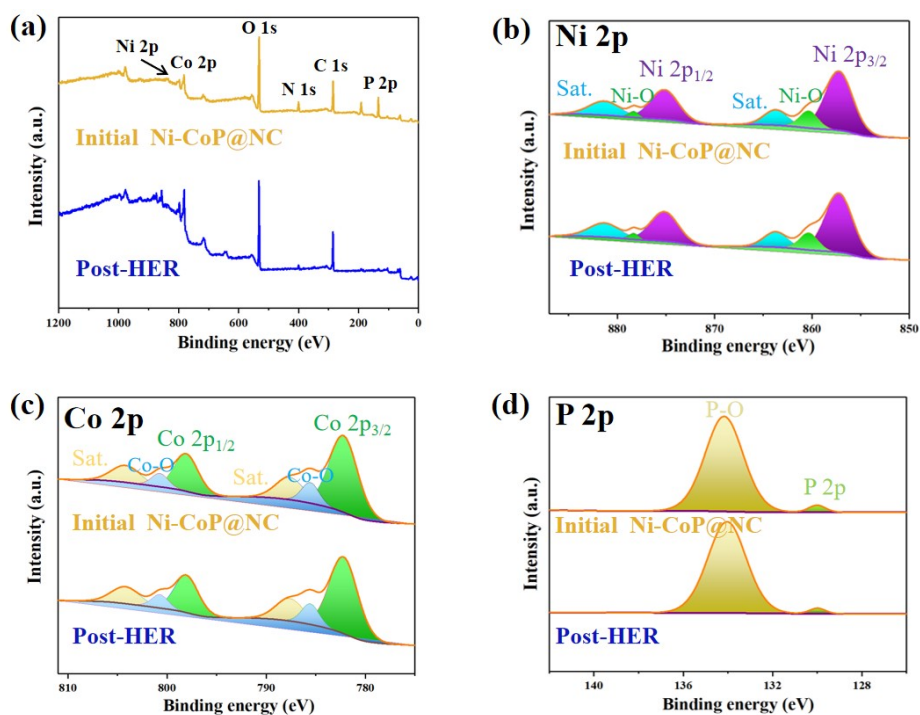

**Fig. S14.** XPS characterization of initial Ni-CoP@NC and Ni-CoP@NC after long-term HER ability measurements: (a) survey, (b) Ni 2p, (c) Co 2p and (d) P 2p spectra.

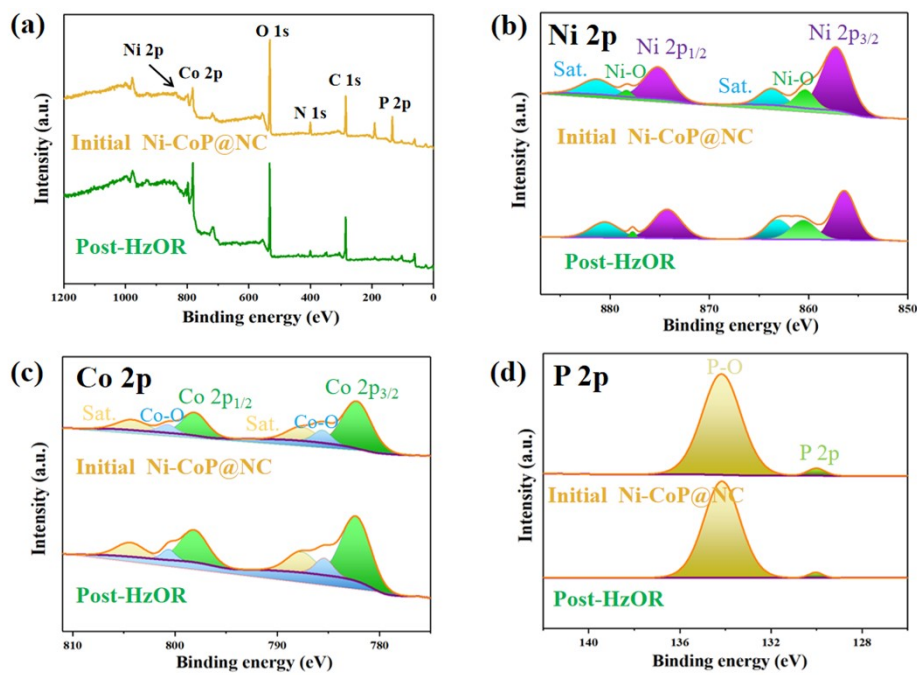

**Fig. S15.** XPS characterization of initial Ni-CoP@NC and Ni-CoP@NC after long-term HzOR ability measurements: (a) survey, (b) Ni 2p, (c) Co 2p and (d) P 2p spectra.

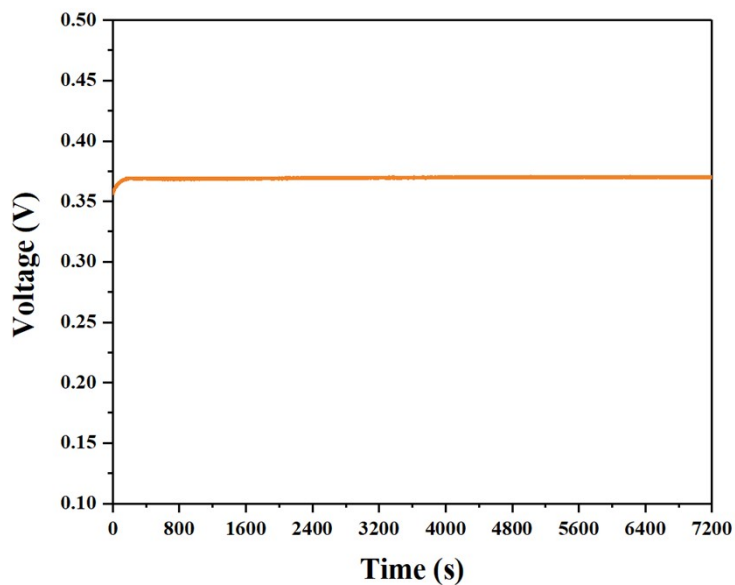

**Fig. S16.** Open circuit voltages of Ni-CoP@NC assembled Zn-hydrazine battery.

### 3. Supplementary tables

**Table S1.** Comparison of HER performance of Ni-CoP@NC with other electrocatalysts.

| Catalyst                                               | Electrolyte                | Overpotential at 1000 mA cm <sup>-2</sup><br>(mV) | Reference |
|--------------------------------------------------------|----------------------------|---------------------------------------------------|-----------|
| Ni-CoP@NC                                              | 1.0 M KOH                  | 143                                               | This work |
| MIL-(IrNiFe)@NF                                        | 1.0 M KOH                  | 198                                               | [1]       |
| FeNi LDH@FF                                            | 1.0 M KOH                  | 400                                               | [2]       |
| Ru-CoO <sub>x</sub> /NF                                | 1.0 M KOH                  | 252                                               | [3]       |
| Ir-nc@m-NiCo                                           | 1.0 M KOH                  | 146                                               | [4]       |
| NiMo/Mo <sub>2</sub> N/NC(500)                         | 1.0 M KOH                  | 271                                               | [5]       |
| MoW <sub>2</sub> NiTe                                  | 1.0 M KOH                  | 182                                               | [6]       |
| MoO <sub>2</sub> @Ru NT                                | 1.0 M KOH                  | 131                                               | [7]       |
| DE 150s ribbon                                         | 1.0 M KOH                  | 104                                               | [8]       |
| RuGa/N-rGO-2                                           | 1.0 M KOH                  | 156                                               | [9]       |
| Ni-MoN-450                                             | 1.0 M KOH                  | 190                                               | [10]      |
| Co-SA/CC                                               | 1.0 M KOH                  | 300                                               | [11]      |
| MnCo/NiSe                                              | 1.0 M KOH                  | 211                                               | [12]      |
| MnCo <sub>2</sub> S <sub>4</sub> @MoS <sub>2</sub> /NF | 6.0 M KOH                  | 208                                               | [13]      |
| SnFeS <sub>x</sub> O <sub>y</sub> /NF                  | 1.0 M KOH                  | 324                                               | [14]      |
| Cu <sub>2</sub> S@NiS@Ni/NiMo                          | 1.0 M NaOH +<br>0.5 M NaCl | 200                                               | [15]      |

**Table S2.** Comparison of HzOR performance of Ni-CoP@NC with other electrocatalysts.

| Catalyst                             | Electrolyte                                                          | Potential at 1000 mA cm <sup>-2</sup><br>(mV) | Reference |
|--------------------------------------|----------------------------------------------------------------------|-----------------------------------------------|-----------|
| Ni-CoP@NC                            | 1.0 M KOH + 0.2 M<br>N <sub>2</sub> H <sub>4</sub>                   | 51                                            | This work |
| Ni <sub>2</sub> Fe <sub>2</sub> N/NF | alkaline hydrazine<br>solution                                       | 300                                           | [16]      |
| Ru-FeP <sub>4</sub> /IF              | 1.0 M KOH + seawater<br>+ 0.5 M N <sub>2</sub> H <sub>4</sub>        | 335                                           | [17]      |
| a-Ni <sub>x</sub> P/Ni/NF            | 1.0 M NaOH + 0.5 M<br>N <sub>2</sub> H <sub>4</sub>                  | 240                                           | [18]      |
| Ru-Cu <sub>2</sub> O/CF              | 1.0 M NaOH + 0.5 M<br>N <sub>2</sub> H <sub>4</sub>                  | 135                                           | [19]      |
| CoP/CF                               | 1.0 M NaOH + 0.4 M<br>N <sub>2</sub> H <sub>4</sub>                  | 180                                           | [20]      |
| Fe-Ni <sub>2</sub> P@MIL-<br>FeNi    | 1.0 M KOH + 0.5 M<br>N <sub>2</sub> H <sub>4</sub> seawater          | 200                                           | [21]      |
| MoNi@NF                              | 1.0 M KOH + 0.5 M<br>N <sub>2</sub> H <sub>4</sub> seawater          | 470                                           | [22]      |
| FeNiP-NPHC                           | 1.0 M KOH + 0.5 M<br>N <sub>2</sub> H <sub>4</sub> seawater<br>1.0 M | 110                                           | [23]      |
| RuFe-Ni <sub>2</sub> P@NF            | KOH + Seawater + 0.5 M<br>N <sub>2</sub> H <sub>4</sub>              | 260                                           | [24]      |
| CoP/Ni <sub>2</sub> P@NF             | 1 M KOH + 0.5 M N <sub>2</sub> H <sub>4</sub><br>seawater.           | 110                                           | [25]      |
| CoH-CoPV@CFP                         | 1.0 M KOH +<br>0.4 M N <sub>2</sub> H <sub>4</sub>                   | 117                                           | [26]      |

**Table S3.** Comparison of OH<sub>2</sub>S performance of Ni-CoP@NC with other electrocatalysts.

| Catalyst                               | Electrolyte                                        | Potential at 1000 mA cm <sup>-2</sup><br>(V) | Reference |
|----------------------------------------|----------------------------------------------------|----------------------------------------------|-----------|
| Ni-CoP@NC                              | 1.0 M KOH +<br>0.5 M N <sub>2</sub> H <sub>4</sub> | 0.49                                         | This work |
| NiMo/Ni <sub>2</sub> P                 | 1.0 M KOH +<br>0.5 M N <sub>2</sub> H <sub>4</sub> | 0.21                                         | [27]      |
| FeNiP-NPHC                             | 1.0 M KOH +<br>0.5 M N <sub>2</sub> H <sub>4</sub> | 0.51                                         | [23]      |
| Fe-CoNiP@NC                            | 1.0 M KOH +<br>0.5 M N <sub>2</sub> H <sub>4</sub> | 0.56                                         | [28]      |
| F-CoP/CF                               | 1.0 M KOH +<br>0.2 M N <sub>2</sub> H <sub>4</sub> | 0.49                                         | [20]      |
| RuFe-Ni <sub>2</sub> P@NF              | 1.0 M KOH +<br>0.5 M N <sub>2</sub> H <sub>4</sub> | 0.70                                         | [29]      |
| FeCo-Ni <sub>2</sub> P@MIL-FeCoNi      | 1.0 M KOH +<br>0.5 M N <sub>2</sub> H <sub>4</sub> | 0.40                                         | [21]      |
| Ru-FeP <sub>4</sub> /IF                | 1.0 M KOH +<br>0.5 M N <sub>2</sub> H <sub>4</sub> | 0.90                                         | [17]      |
| Mo-Ni <sub>2</sub> P <sub>v</sub> @MNF | 1.0 M KOH+0.5<br>M N <sub>2</sub> H <sub>4</sub>   | 0.57                                         | [30]      |
| MoNi@NF                                | 1.0 M KOH +<br>0.5 M N <sub>2</sub> H <sub>4</sub> | 0.54                                         | [22]      |
| Fe/F-Ni <sub>2</sub> P@NC              | 1.0 M KOH +<br>0.5 M N <sub>2</sub> H <sub>4</sub> | 0.57                                         | [24]      |



**Table S4.** Comparison of OWS performance of Ni-CoP@NC with other electrocatalysts.

| Catalyst                                                             | Electrolyte | Potential at 1000 mA cm <sup>-2</sup><br>(V) | Reference |
|----------------------------------------------------------------------|-------------|----------------------------------------------|-----------|
| Ni-CoP@NC                                                            | 1.0 M KOH   | 1.82                                         | This work |
| Co <sub>0.03</sub> -NiFe <sub>0.97</sub> LDH                         | 1.0 M KOH   | 1.53                                         | [31]      |
| Ir/CoMoO <sub>4</sub> /NF                                            | 1.0 M KOH   | 1.81                                         | [32]      |
| MnCo <sub>2</sub> S <sub>4</sub> @MoS <sub>2</sub> /NF               | 6.0 M KOH   | 1.79                                         | [33]      |
| LVN-0.1                                                              | 1.0 M KOH   | 1.94                                         | [34]      |
| FeOOH/Co <sub>9</sub> S <sub>8</sub> /Ni <sub>3</sub> S <sub>2</sub> | 1.0 M KOH   | 1.80                                         | [35]      |
| nano-KFO/NF                                                          | 1.0 M KOH   | 1.95                                         | [36]      |
| CoB@MOF@CC                                                           | 1.0 M KOH   | 2.10                                         | [37]      |
| NiO/RuO <sub>2</sub> /NF                                             | 6.0 M KOH   | 1.78                                         | [38]      |

## References

- [1] X.-J. Zhai, Q.-P. Yu, G.-S. Liu, J.-L. Bi, Y. Zhang, J.-Q. Chi, J.-P. Lai, B. Yang, L. Wang, Hierarchical microsphere MOF arrays with ultralow Ir doping for efficient hydrogen evolution coupled with hydrazine oxidation in seawater, *J. Mater. Chem. A*, 2021, **9**, 27424-27433.
- [2] Y. Feng, Y. Wei, S.-J. Liu, P. Li, K. Akhtar, E.-M. Bakhsh, S.-B. Khan, Y. Shen, Enhanced hydrogen evolution reaction activity of FeNi layered double hydroxide modified with Ruthenium nanoparticles at high current density, *J. Electroanal.*, 2023, **938**, 117451.
- [3] T. Wu, M.-Z. Sun, H.-H. Wong, C.-H. Chan, L. Lu, Q.-Y. Lu, B.-A. Chen, B.-L. Huang, Recent advances and strategies of electrocatalysts for large current density industrial hydrogen evolution reaction, *Inorg. Chem. Front.*, 2023, **10**, 4632-4649.
- [4] J.-X. Yuan, J.-S. Zhou, Z.-H. Peng, G. Li, Y. Hou, K.-H. Leung, Enhanced electrocatalytic hydrogen evolution in alkaline saline electrolyte by NiCo foam supported iridium nanoclusters, *J. Mater. Chem. A*, 2024, **12**, 2383-2390.
- [5] H.-L. Jia, H.-Y. Wang, F.-F. Yan, H.-C. Zhang, Z. Li, J.-J. Wang, Unravelling electrocatalytic concerted diatomic-ensembles over superior hydrogen-evolution array structured by NiMo/Mo<sub>2</sub>N heteronanojunctions, *Appl. Catal. B-Environ.*, 2024, **343**, 123362.
- [6] S.-H. Jo, W.-X. Liu, Y.-A. Yue, K.-H. Shin, K.-B. Lee, H. Choi, B. Hou, J. Sohn, Novel ternary metals-based telluride electrocatalyst with synergistic effects of high valence non-3d metal and oxophilic Te for pH-universal hydrogen evolution reaction, *J. Energy Chem.*, 2023, **80**, 736-743.
- [7] Y. Zhang, C.-Q. Ma, X.-J. Zhu, K.-Y. Qu, P.-D. Shi, L.-Y. Song, J. Wang, Q.-P. Lu, A.-L. Wang, Hetero-Interface Manipulation in MoO<sub>x</sub>@Ru to Evoke Industrial Hydrogen Production Performance with Current Density of 4000 mA cm<sup>-2</sup>, *Adv. Energy Mater.*, 2023, **13**, 2301492.
- [8] X.-Y. Zhang, Y.-Y. Yang, Y.-J. Liu, Z. Jia, Q.-Q. Wang, L.-G. Sun, L.-C. Zhang, J.-J. Kruzic, J. Lu, B.-L. Shen, Defect Engineering of a High-Entropy Metallic Glass

Surface for High-Performance Overall Water Splitting at Ampere-Level Current Densities, *Adv. Mater.*, 2023, **35**, 2303439.

[9] H.-F. Zhang, C.-Q. Cheng, J. Zhou, C.-Q. Ma, P.-D. Shi, H.-M. Wu, P.-F. Yin, W.-B. Cao, J. Xia, L.-J. Zhu, A.-L. Wang, Q.-P. Lu, Atomically dispersed ruthenium sites with electron-rich environments in intermetallic compounds for high-current-density hydrogen evolution, *J. Mater. Chem. A*, 2023, **11**, 10328-10336.

[10] Y.-B. Liu, B.-W. Zhou, Y.-B. Zhang, W.-P. Xiao, B. Li, Z.-X. Wu, L. Wang, In situ synthesis of two-dimensional graphene-like nickel-molybdenum nitride as efficient electrocatalyst towards water-splitting under large-current density, *J. Colloid Interface Sci.*, 2023, **637**, 104-111.

[11] P.-W. Zhao, C. Peng, Q.-C. Zhang, X.-B. Fan, H.-Y. Chen, Y.-Z. Zhu, Y. Min, Carbon-coordinated atomic cobalt directly embedded on carbon cloth for alkaline hydrogen evolution at high current density, *Chem. Eng. J.*, 2023, **461**, 142037.

[12] R. Andaveh, A.-S. Rouhaghdam, J.-P. Ai, M. Maleki, K. Wang, A. Seif, G.-B. Darband, J.-Y. Li, Boosting the electrocatalytic activity of NiSe by introducing MnCo as an efficient heterostructured electrocatalyst for large-current-density alkaline seawater splitting, *Appl. Catal. B-Environ.*, 2023, **325**, 122355.

[13] T.-T. Ma, X.-R. Shen, Q.-Z. Jiao, Y. Zhao, H.-S. Li, Y.-Y. Zhang, Y.-Z. Lv, C.-H. Feng, L. Guo, In-situ construction of hexagonal-star-shaped MnCo<sub>2</sub>S<sub>4</sub>@MoS<sub>2</sub> boosting overall water splitting performance at large-current-density: Compositional-electronic regulation, functions and mechanisms, *Chem. Eng. J.*, 2023, **464**, 142592.

[14] T. Zhang, J.-Y. Han, T.-M. Tang, J.-R. Sun, J.-Q. Guan, Binder-free bifunctional SnFe sulfide/oxyhydroxide heterostructure electrocatalysts for overall water splitting, *Int. J. Hydrogen Energy.*, 2023, **48**, 4594-4602.

[15] W.-W. Xu, T.-F. Ma, H.-C. Chen, D.-H. Pan, Z.-F. Wang, S.-X. Zhang, P. Zhang, S.-J. Bao, Q.-H. Yang, L.-H. Zhou, Z.-Q. Tian, S. Dai, Z.-Y. Lu, Scalable Fabrication of Cu<sub>2</sub>S@NiS@Ni/NiMo Hybrid Cathode for High-Performance Seawater Electrolysis, *Adv. Funct. Mater.*, 2023, **33**, 2302263.

- [16] P.-P. Tang, H. Wen, P. Wang, Hierarchically nanostructured Ni<sub>2</sub>Fe<sub>2</sub>N as an efficient electrocatalyst for hydrazine oxidation reaction, *Chem. Eng. J.*, 2022, **431**, 134123.
- [17] T. Cui, J.-Q. Chi, J.-W. Zhu, X.-M. Sun, J.-P. Lai, Z.-J. Li, L. Wang, Tuning the size and chemisorption of FeP<sub>4</sub> by trace Ru doping for hydrazine-assisted hydrogen evolution in seawater at large-current-density, *Appl. Catal. B-Environ.*, 2022, 319, 121950.
- [18] J.-F. Liu, H. Wen, Z.-Y. Zhang, P. Wang, An amorphous/nanocrystalline Ni<sub>x</sub>P/Ni heterojunction for electrooxidation of hydrazine, *J. Mater. Chem. A*, 2023, **11**, 14213-14220.
- [19] P. Shen, B.-W. Zhou, Z. Chen, W.-P. Xiao, Y.-L. Fu, J. Wan, Z.-X. Wu, L. Wang, Ruthenium-doped 3D Cu<sub>2</sub>O nanochains as efficient electrocatalyst towards hydrogen evolution and hydrazine oxidation, *Appl. Catal. B-Environ.*, 2023, **325**, 122305.
- [20] K. Li, Y. Tong, J.-F. He, X.-Y. Liu, P.-Z. Chen, Anion-modulated CoP electrode as bifunctional electrocatalyst for anion-exchange membrane hydrazine-assisted water electrolyser, *Mater. Horiz.*, 2023, **10**, 5277-5287.
- [21] Q.-P. Yu, J.-Q. Chi, G.-S. Liu, X.-Y. Wang, X.-B. Liu, Z.-J. Li, Y. Deng, X.-P. Wang, L. Wang, Dual-strategy of hetero-engineering and cation doping to boost energy-saving hydrogen production via hydrazine-assisted seawater electroly, *Sci China Mater.*, 2022, **65**, 1539-1549.
- [22] L.-L. Guo, Q.-P. Yu, X.-J. Zhai, J.-Q. Chi, T. Cui, Y. Zhang, J.-P. Lai, L. Wang, Reduction-induced interface reconstruction to fabricate MoNi<sub>4</sub>-based hollow nanorods for hydrazine oxidation assisted energy-saving hydrogen production in seawater, *Nano Resv.*, 2022, **15**, 8846-8856.
- [23] Q.-P. Yu, X.-B. Liu, G.-S. Liu, X.-P. Wang, Z.-J. Li, B. Li, Z.-X. Wu, L. Wang, Constructing Three-Phase Heterojunction with 1D/3D Hierarchical Structure as Efficient Trifunctional Electrocatalyst in Alkaline Seawater, *Adv. Funct. Mater.*, 2022, **32**, 2205767.
- [24] X.-J. Zhai, Q.-P. Yu, J.-Q. Chi, X.-P. Wang, B. Li, B. Yang, Z.-J. Li, J.-P. Lai, L. Wang, Accelerated dehydrogenation kinetics through Ru, Fe dual-doped Ni<sub>2</sub>P as

bifunctional electrocatalyst for hydrazine-assisted self-powered hydrogen generation, *Nano Energy*, 2023, **105**, 108008.

[25] W.-J. Liu, W.-X. Liu, T. Hou, J.-Y. Ding, Z.-G. Wang, R.-L. Yin, X.-Y. San, L.-G. Feng, J. Luo, X.-J. Liu, Coupling Co-Ni phosphides for energy-saving alkaline seawater splitting, *Nano Res.*, 2024, **17**, 4794-4806.

[26] X.-T. Wei, S.-C. Zhang, X.-S. Lv, S.-X. Dai, H.-L. Wang, M.-H. Huang, Local-reconstruction enables cobalt phosphide array with bifunctional hydrogen evolution and hydrazine oxidation, *Appl. Catal. B-Environ.*, 2024, **345**, 123661.

[27] Y.-F. Yang, X.-Y. Li, G.-L. Liu, H.-X. Liu, Y.-H. Shi, C.-M. Ye, Z. Fang, M.-X. Ye, J.-F. Shen, Hierarchical Ohmic Contact Interface Engineering for Efficient Hydrazine-Assisted Hydrogen Evolution Reaction, *Adv. Mater.*, 2024, **36**, 2307979.

[28] X.-Y. Wang, W.-H. Zhang, Q.-P. Yu, X.-B. Liu, Q.-C. Liang, X.-M. Meng, X.-P. Wang, L. Wang, Fe-doped CoNiP@N-doped carbon nanosheet arrays for hydrazine oxidation assisting energy-saving seawater splitting, *Chem. Eng. J.*, 2022, **446**, 136987.

[29] J.-Q. Chi, L.-L. Guo, J.-Y. Mao, T. Cui, J.-W. Zhu, Y.-A. Xia, J.-P. Lai, L. Wang, Modulation of Electron Structure and Dehydrogenation Kinetics of Nickel Phosphide for Hydrazine-Assisted Self-Powered Hydrogen Production in Seawater, *Adv. Funct. Mater.*, 2023, **33**, 2300625.

[30] W.-H. Zhang, X.-B. Liu, Q.-P. Yu, X.-Y. Wang, H.-M. Mao, J.-Q. Chi, B. Li, J. Wan, L. Wang, In situ electronic redistribution of Ni<sub>2</sub>P hierarchical structure for energy-saving hydrogen production in seawater, *Chem. Eng. J.*, 2023, **454**, 140210.

[31] Y.-P. Ye, H.-Y. Li, J. Cao, X.-Y. Liu, H.-G. Fan, M.-B. Wei, L.-L. Yang, J.-H. Yang, Y.-L. Chen, Constructing microstructures in nickel-iron layered double hydroxide electrocatalysts by cobalt doping for efficient overall water splitting, *Int. J. Hydrogen Energy*, 2023, **48**, 17026-17034.

[32] Y.-A. Chang, X.-Y. Lu, S.-S. Wang, X.-X. Li, Z.-Y. Yuan, J.-C. Bao, Y. Liu, Built-In Electric Field Boosted Overall Water Electrolysis at Large Current Density for the Heterogeneous Ir/CoMoO<sub>4</sub> Nanosheet Arrays, *Small*, 2024, 2311763.

[33] T.-T. Ma, X.-R. Shen, Q.-Z. Jiao, Y. Zhao, H.-S. Li, Y.-Y. Zhang, Y.-Z. Lv, C.-H. Feng, L. Guo, In-situ construction of hexagonal-star-shaped MnCo<sub>2</sub>S<sub>4</sub>@MoS<sub>2</sub> boosting

overall water splitting performance at large-current-density: Compositional-electronic regulation, functions, and mechanisms, *Chem. Eng. J.*, 2023, **464**, 142592.

[34] Q.-N. Ha, N.-S. Gultom, C.-H. Yeh, D.-H. Kuo, One-pot synthesized Li, V co-doped Ni<sub>3</sub>S<sub>2</sub> nanorod arrays as a bifunctional electrocatalyst for industrialization-facile hydrogen production via alkaline exchange membrane water electrolysis, *Chem. Eng. J.*, 2023, **472**, 144931.

[35] Y.-Y. Qian, B.-H. Zhou, Q. Zhang, H.-M. Yang, Rational Design of Goethite-Sulfide Nanowire Heterojunctions for High Current Density Water Splitting, *J. Phys. Chem. Lett.*, 2023, **14**, 6709-6718.

[36] S.-S. Li, E. Li, X.-W. An, X.-G. Hao, Z.-Q. Jiang, G.-Q. Guan, Transition metal-based catalysts for electrochemical water splitting at high current density: current status and perspectives, *Nanoscale*, 2021, **13**, 12788-12817.

[37] J.-L. Fan, C.-Y. Fu, R.-K. Liang, H.-Y. Lv, C.-S. Fang, Y.-H. Guo, W.-J. Hao, Mild Construction of “Midas Touch” Metal-Organic Framework-Based Catalytic Electrodes for Highly Efficient Overall Seawater Splitting, *Small*, 2022, **18**, 2203588.

[38] T.-Q. Yu, Q.-L. Xu, L. Luo, C.-R. Liu, S.-B. Yin, Interface engineering of NiO/RuO<sub>2</sub> heterojunction nano-sheets for robust overall water splitting at large current density, *Chem. Eng. J.*, 2022, **430**, 133117.
